# Supplementary material for: Oriented Au–Cu nanoalloy particle incorporated SiO2films using a new layer by layer deposition technique
Source: Royal Society of Chemistry journal article supplement (doi:10.1039/b612539e), 2006-11-24
Supplement: b612539e.pdf [file b612539e.pdf]

**Electronic supplementary information (ESI)**

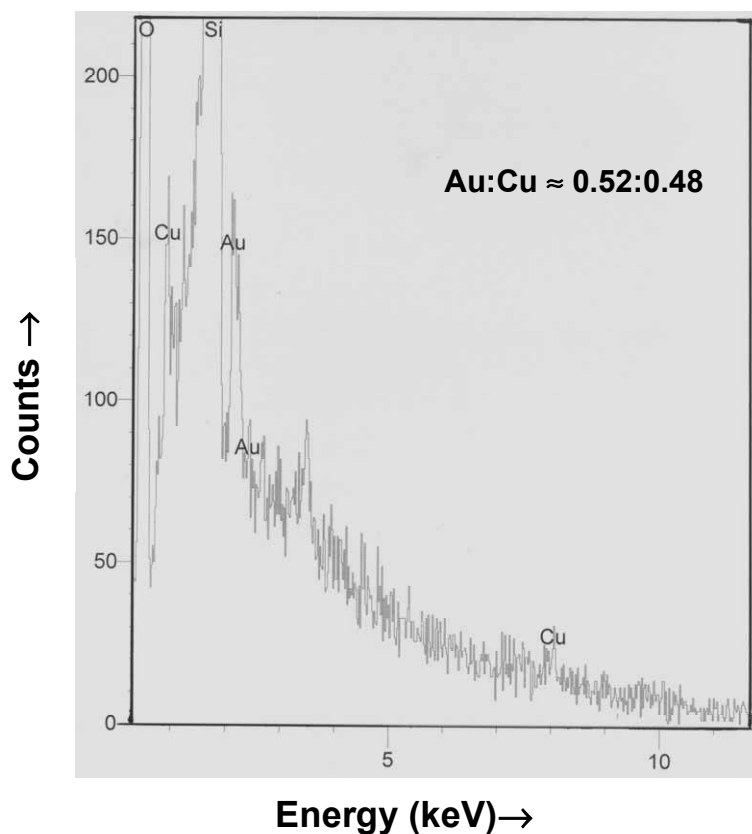

**Figure S1 (Electronic supplementary information):** A representative EDAX spectrum of the TL film sample after final alloy formation at 750 °C in H<sub>2</sub>-Ar. An atomic ratio of Au:Cu ≈ 0.52:48 has been estimated from the signals of Au and Cu.
